# Supplementary material for: Transcriptome Analysis of an Aedes albopictus Cell Line Single- and Dual-Infected with Lammi Virus and WNV
Source: MDPI journal article supplement (doi:10.3390/ijms23020875), 2022-01-14
Supplement: s1 [file s1]

**Supplementary Table S2.** List of *Ae. albopictus* differentially expressed transcripts (>10 fold change) post-infection with WNV. Bold numbers have p-adjust value  $\leq 0.01$ .

| Transcript ID | Gene description                     | Fold change<br>24 hpi with<br>WNV | Fold change<br>48 hpi with<br>WNV |
|---------------|--------------------------------------|-----------------------------------|-----------------------------------|
| AALF021807    | C-Type Lysozyme (Lys-E)              | <b>433,71</b>                     | 6,35                              |
| AALF003252    | Unspecified product                  | <b>141,9</b>                      | 19,98                             |
| AALF016234    | C-Type Lectin                        | <b>82,89</b>                      | <b>17,75</b>                      |
| AALF010414    | Beta-hexosaminidase b                | <b>73,17</b>                      | 1,87                              |
| AALF026511    | Carbonic anhydrase                   | <b>70,41</b>                      | 1,3                               |
| AALF013298    | Unspecified product                  | <b>69,1</b>                       | <b>14,16</b>                      |
| AALF022426    | Unspecified product                  | <b>58,22</b>                      | 14,16                             |
| AALF009966    | Unspecified product                  | <b>57,53</b>                      | 4,39                              |
| AALF003774    | Fibrinogen and fibronectin           | <b>52,23</b>                      | <b>18,48</b>                      |
| AALF019859    | Clip-Domain Serine Protease family B | <b>49,51</b>                      | <b>9,26</b>                       |
| AALF008821    | Defensin anti-microbial peptide      | <b>45,85</b>                      | <b>57,72</b>                      |
| AALF008776    | Aromatic amino acid decarboxylase    | <b>44,86</b>                      | 2,51                              |
| AALF022425    | Unspecified product                  | <b>30,38</b>                      | <b>2,29</b>                       |
| AALF009414    | Putative secreted protein            | <b>27,47</b>                      | 4,74                              |
| AALF026731    | Unspecified product                  | <b>22,22</b>                      | <b>98,88</b>                      |
| AALF001194    | Unspecified product                  | <b>21,13</b>                      | 5,21                              |
| AALF008229    | Unspecified product                  | <b>19,82</b>                      | <b>7,04</b>                       |
| AALF001093    | Calreticulin                         | <b>18,76</b>                      | -1,57                             |
| AALF007742    | Unspecified product                  | <b>18,4</b>                       | 2,27                              |
| AALF020341    | Unspecified product                  | <b>18,35</b>                      | 3,91                              |
| AALF023135    | Unspecified product                  | <b>18,07</b>                      | 3,07                              |
| AALF016505    | Leucine-rich immune protein          | <b>16,83</b>                      | 2,96                              |
| AALF025212    | Transferrin                          | <b>15,95</b>                      | <b>20,69</b>                      |
| AALF020197    | Clip-Domain Serine Protease family B | <b>15,25</b>                      | -1,18                             |
| AALF020799    | Peptidoglycan Recognition Protein    | <b>14,48</b>                      | <b>10,23</b>                      |
| AALF000812    | Unspecified product                  | <b>14,36</b>                      | 1,98                              |
| AALF001195    | Unspecified product                  | <b>12,68</b>                      | <b>9,79</b>                       |
| AALF007525    | Unspecified product                  | <b>12,62</b>                      | 4,11                              |
| AALF008452    | Unspecified product                  | <b>12,07</b>                      | <b>10,83</b>                      |
| AALF003040    | Unspecified product                  | <b>11,56</b>                      | 2,87                              |
| AALF015567    | Cystathionine beta-synthase          | <b>11,47</b>                      | 2,02                              |
| AALF014689    | Fibrinogen and fibronectin           | <b>10,71</b>                      | 1,91                              |
| AALF002418    | Imaginal disc growth factor          | <b>10,45</b>                      | <b>10,37</b>                      |
| AALF023540    | Unspecified product                  | <b>10,41</b>                      | -1,07                             |
| AALF001232    | Pyruvate carboxylase                 | <b>10,24</b>                      | -3,08                             |
| AALF016365    | Munc13-4                             | <b>10,04</b>                      | 1,74                              |
| AALF011706    | Unspecified product                  | <b>-10,8</b>                      | 1,09                              |
| AALF028505    | Unspecified product                  | <b>-13,71</b>                     | <b>-12,83</b>                     |
| AALF020168    | Unspecified product                  | <b>-13,92</b>                     | -1,24                             |

|            |                                            |            |        |
|------------|--------------------------------------------|------------|--------|
| AALF025541 | Unspecified product                        | -15,28     | 1,39   |
| AALF008099 | Endothelin-converting enzyme               | -15,38     | -3,91  |
| AALF000742 | Unspecified product                        | -15,83     | 1,29   |
| AALF008879 | Type IV inositol 5-phosphatase             | -16,64     | -10,21 |
| AALF016756 | Sugar transporter                          | -16,64     | 1      |
| AALF022022 | cdk11/4                                    | -23,57     | -1,52  |
| AALF004114 | No-mechanoreceptor potential a             | -24,63     | 1,32   |
| AALF011390 | Putative ecdysone-induced protein          | -26,46     | -2,2   |
| AALF020798 | Unspecified product                        | -29,42     | -1,31  |
| AALF000142 | Unspecified product                        | -31,2      | -2,65  |
| AALF009909 | Unspecified product                        | -32,38     | -2,74  |
| AALF001259 | Unspecified product                        | -36,11     | -1,03  |
| AALF014478 | Heat shock protein HSP70                   | -37,19     | 4,22   |
| AALF012770 | Aldehyde oxidase                           | -37,85     | -2,04  |
| AALF001105 | Unspecified product                        | -40,85     | 1,86   |
| AALF002857 | Unspecified product                        | -42,79     | -4,51  |
| AALF002636 | Unspecified product                        | -43,23     | 1,03   |
| AALF014479 | Unspecified product                        | -45,7      | 6,53   |
| AALF025810 | Unspecified product                        | -51,7      | -1,85  |
| AALF013937 | Serine protease                            | -51,98     | -2,31  |
| AALF014375 | Unspecified product                        | -57,5      | -3,56  |
| AALF014481 | Unspecified product                        | -61,02     | 5,22   |
| AALF027745 | Microtubule-associated protein             | -61,92     | 1,59   |
| AALF009202 | C-Type Lectin (CTL)                        | -65,35     | 1,56   |
| AALF006472 | Unspecified product                        | -86,05     | -3,82  |
| AALF015015 | Unspecified product                        | -230,7     | 22,72  |
| AALF015014 | Clip-Domain Serine Protease family D       | -246,26    | -2,96  |
| AALF016295 | Unspecified product                        | -249,48    | -5     |
| AALF014395 | Unspecified product                        | -605,5     | -4,51  |
| AALF028496 | Unspecified product                        | -78564,47  | 1,33   |
| AALF005731 | Zinc finger protein                        | -109162,03 | 1,92   |
| AALF009658 | Unspecified product                        | -1,3       | 31,17  |
| AALF019759 | Unspecified product                        | 1,81       | 29,21  |
| AALF000656 | Cecropin-A2                                | 16,79      | 27,72  |
| AALF010887 | Unspecified product                        | -1,08      | 23,96  |
| AALF011779 | Unspecified product                        | 3,84       | 21,6   |
| AALF005659 | Unspecified product                        | -1,38      | 16,37  |
| AALF020693 | Unspecified product                        | -2,54      | 16,03  |
| AALF005658 | Unspecified product                        | -3,45      | 14,96  |
| AALF019136 | Unspecified product                        | -1,68      | 14,5   |
| AALF015016 | Lethal(2)essential for life protein, l2efl | -9,24      | 13,31  |
| AALF011176 | Acylphosphatase                            | 1,16       | 13,16  |
| AALF000457 | Unspecified product                        | 1,46       | 12,97  |

|            |                                                  |       |        |
|------------|--------------------------------------------------|-------|--------|
| AALF023579 | Unspecified product                              | 1,13  | 12,72  |
| AALF026129 | UPF0184 protein                                  | 1,93  | 11,61  |
| AALF025560 | c4b-binding protein beta chain                   | 7,42  | 11,43  |
| AALF014826 | Unspecified product                              | 1,78  | 11,12  |
| AALF013319 | Unspecified product                              | 4,99  | 11,12  |
| AALF018157 | Unspecified product                              | 5,32  | 10,37  |
| AALF002626 | 40S ribosomal protein S21                        | -1,5  | 10,19  |
| AALF006531 | Unspecified product                              | 6,54  | 10,18  |
| AALF016228 | Dolichol-phosphate mannosyltransferase subunit 3 | 2,49  | 10,14  |
| AALF015599 | Unspecified product                              | 3,03  | -10,3  |
| AALF015221 | Unspecified product                              | 1,97  | -10,34 |
| AALF020651 | Unspecified product                              | 2,84  | -10,51 |
| AALF014559 | Unspecified product                              | 5,02  | -10,53 |
| AALF021818 | Unspecified product                              | -1,64 | -10,76 |
| AALF016237 | Unspecified product                              | 2,97  | -11,03 |
| AALF024446 | Unspecified product                              | 3,83  | -11,82 |
| AALF015711 | Unspecified product                              | 6,43  | -12,13 |
| AALF000130 | Unspecified product                              | 3,56  | -12,54 |
| AALF019880 | Unspecified product                              | 1,25  | -12,85 |
| AALF009765 | Unspecified product                              | -1,77 | -12,93 |
| AALF013917 | Unspecified product                              | 5,38  | -13,07 |
| AALF013610 | Unspecified product                              | 1,27  | -13,14 |
| AALF020871 | Unspecified product                              | 3,25  | -13,26 |
| AALF022735 | Unspecified product                              | 5,48  | -13,63 |
| AALF006220 | Unspecified product                              | 2,6   | -13,64 |
| AALF017380 | Unspecified product                              | 4,29  | -14    |
| AALF013129 | Unspecified product                              | -1,93 | -14,88 |
| AALF006549 | Unspecified product                              | 3,88  | -15,21 |
| AALF022033 | Unspecified product                              | 1,04  | -15,3  |
| AALF018633 | Unspecified product                              | -3,16 | -16,39 |
| AALF008765 | Unspecified product                              | -1,18 | -16,52 |
| AALF025208 | Unspecified product                              | 4,68  | -17,47 |
| AALF013096 | Unspecified product                              | 1,63  | -19,32 |
| AALF020652 | Unspecified product                              | 3,74  | -19,54 |
| AALF000129 | Unspecified product                              | 4,63  | -20    |
| AALF021783 | Unspecified product                              | 7,45  | -22,85 |
| AALF013722 | Unspecified product                              | 5,27  | -24,51 |
| AALF013353 | Unspecified product                              | 6     | -29,13 |
