# Supplementary material for: Transcriptome Analysis of an Aedes albopictus Cell Line Single- and Dual-Infected with Lammi Virus and WNV
Source: MDPI journal article supplement (doi:10.3390/ijms23020875), 2022-01-14
Supplement: s1 [file s1]

**Supplementary Table S1.** List of *Ae. albopictus* differentially expressed transcripts (>10 fold change) post-infection with LamV. Bold numbers have p-adjust value  $\leq 0.01$ .

| Transcript ID | Gene description                                    | fold<br>change 24<br>hpi with<br>LamV | fold<br>change 48<br>hpi with<br>LamV | Fold<br>change 72<br>hpi with<br>LamV |
|---------------|-----------------------------------------------------|---------------------------------------|---------------------------------------|---------------------------------------|
| AALF020879    | Unspecified product                                 | <b>12,61</b>                          | <b>7,6</b>                            | 2,44                                  |
| AALF012914    | Unspecified product                                 | <b>11,92</b>                          | <b>7,94</b>                           | 3,77                                  |
| AALF005471    | 40S ribosomal protein S21                           | <b>11,38</b>                          | <b>13,49</b>                          | <b>7,08</b>                           |
| AALF002626    | 40S ribosomal protein S21                           | <b>10,94</b>                          | <b>8</b>                              | <b>8,62</b>                           |
| AALF017826    | COX6C domain-containing protein                     | <b>10,08</b>                          | <b>12,89</b>                          | 4,54                                  |
| AALF005278    | Unspecified product                                 | 11,77                                 | <b>241938955</b>                      | 29,56                                 |
| AALF010569    | J domain-containing protein                         | 26,5                                  | <b>5787,58</b>                        | 1229,88                               |
| AALF004571    | DUF3456 domain-containing protein                   | 2,34                                  | <b>55,17</b>                          | <b>85,91</b>                          |
| AALF010775    | CHCH domain-containing protein                      | -1,71                                 | <b>49,97</b>                          | <b>70,98</b>                          |
| AALF003990    | Mannosyltransferase                                 | 3,09                                  | <b>34,71</b>                          | <b>42,1</b>                           |
| AALF005663    | Lethal(2)essential for life protein                 | 2,76                                  | <b>23,89</b>                          | <b>17,34</b>                          |
| AALF006960    | Derlin                                              | 3,09                                  | <b>22,59</b>                          | <b>14,45</b>                          |
| AALF011414    | Unspecified product                                 | 4,1                                   | <b>22,33</b>                          | <b>30,57</b>                          |
| AALF021835    | BiP/GRP78                                           | 1,13                                  | <b>21,95</b>                          | <b>18,06</b>                          |
| AALF006247    | Putative microsomal signal peptidase 25 kDa subunit | 1,69                                  | <b>19,29</b>                          | <b>17,61</b>                          |
| AALF004828    | Putative secreted protein                           | 1,57                                  | <b>19,05</b>                          | 6,27                                  |
| AALF025486    | Unspecified product                                 | 1,19                                  | <b>18,49</b>                          | <b>30,07</b>                          |
| AALF013670    | Unspecified product                                 | 4,23                                  | <b>18,26</b>                          | <b>13,38</b>                          |
| AALF014036    | DUF4536 domain-containing protein                   | 4,54                                  | <b>18,014</b>                         | 11,57                                 |
| AALF002158    | Unspecified product                                 | 7,68                                  | <b>17,49</b>                          | 4,19                                  |
| AALF005738    | Unspecified product                                 | 1,73                                  | <b>16,85</b>                          | <b>30,78</b>                          |
| AALF010933    | Unspecified product                                 | 3,68                                  | <b>16,29</b>                          | 2,56                                  |
| AALF003192    | Signal peptidase complex subunit 3                  | 2,28                                  | <b>15,78</b>                          | <b>12,19</b>                          |
| AALF021815    | Sulfhydryl oxidase                                  | 3,06                                  | <b>14,91</b>                          | <b>26,66</b>                          |
| AALF009959    | UDP-galactose transporter                           | 1,91                                  | <b>14,32</b>                          | 5,33                                  |
| AALF002306    | Unspecified product                                 | 2,44                                  | <b>14,27</b>                          | <b>10,24</b>                          |
| AALF020693    | Unspecified product                                 | 4,45                                  | <b>14,19</b>                          | <b>27,96</b>                          |
| AALF013715    | Unspecified product                                 | 2,31                                  | <b>13,07</b>                          | <b>30,66</b>                          |
| AALF026819    | Unspecified product                                 | 1,77                                  | <b>12,74</b>                          | 4,98                                  |
| AALF002752    | Unspecified product                                 | 1,33                                  | <b>12,53</b>                          | <b>19,52</b>                          |
| AALF005644    | Protein KRTCAP2 homolog                             | 5,37                                  | <b>12,39</b>                          | <b>19,59</b>                          |
| AALF017325    | Unspecified product                                 | 5,09                                  | <b>11,93</b>                          | <b>12,31</b>                          |
| AALF011939    | Endoplasmin                                         | -1,03                                 | <b>11,87</b>                          | <b>6,12</b>                           |
| AALF023162    | Sep15_SelM domain-containing protein                | 3,78                                  | <b>11,55</b>                          | 5,95                                  |
| AALF012595    | EGF-like domain-containing protein                  | 1,7                                   | <b>10,85</b>                          | 5,93                                  |
| AALF002612    | Putative mitochondrial respiratory chain complex i  | 6,11                                  | <b>10,79</b>                          | 2,89                                  |
| AALF005815    | Unspecified product                                 | 5,73                                  | <b>10,65</b>                          | 4,09                                  |

|            |                                                                             |       |               |               |
|------------|-----------------------------------------------------------------------------|-------|---------------|---------------|
| AALF012691 | Dolichyl-diphosphooligosaccharide--protein glycosyltransferase subunit DAD1 | 2,75  | <b>10,07</b>  | 5,41          |
| AALF021504 | Unspecified product                                                         | 1,14  | <b>10,01</b>  | <b>6,75</b>   |
| AALF013722 | DNA polymerase                                                              | -1,5  | <b>-10,74</b> | -5,1          |
| AALF012716 | Prophenoloxidase                                                            | -1,01 | <b>-12,04</b> | <b>-14,42</b> |
| AALF003040 | Unspecified product                                                         | -1,2  | <b>-13,45</b> | -7,45         |
| AALF016470 | Carboxylic ester hydrolase                                                  | -1,79 | <b>-16,91</b> | <b>-87,5</b>  |
| AALF013640 | J domain-containing protein                                                 | 1,61  | 28,45         | <b>165,75</b> |
| AALF012753 | CHCH domain-containing protein                                              | -1,22 | 12,43         | <b>41,5</b>   |
| AALF003110 | Unspecified product                                                         | 1,49  | <b>9,49</b>   | <b>39,45</b>  |
| AALF003128 | 4-nitrophenylphosphatase                                                    | 1,91  | 13,52         | <b>32,13</b>  |
| AALF011149 | LITAF domain-containing protein                                             | 3,96  | 3,81          | <b>29,8</b>   |
| AALF007387 | Unspecified product                                                         | 2,03  | 2,59          | <b>24,95</b>  |
| AALF022006 | Belongs to the HAD-like hydrolase superfamily                               | 1,09  | 9,24          | <b>23,94</b>  |
| AALF026344 | Belongs to the GrpE family                                                  | 1,89  | 4             | <b>22,5</b>   |
| AALF026694 | GrpE protein homolog                                                        | 1,71  | 5,85          | <b>22,07</b>  |
| AALF028423 | Poly [ADP-ribose] polymerase                                                | 1,81  | <b>8,72</b>   | <b>20,94</b>  |
| AALF019485 | Brix domain-containing protein                                              | 1,99  | 3,64          | <b>19,67</b>  |
| AALF024199 | HSP-70 binding protein                                                      | 1,96  | 8,66          | <b>19,28</b>  |
| AALF015016 | Lethal(2)essential for life protein, l2efl                                  | 1,4   | <b>8,95</b>   | <b>18,32</b>  |
| AALF019596 | Unspecified product                                                         | 2,23  | 9,55          | <b>17,42</b>  |
| AALF023086 | sil1                                                                        | 1,94  | <b>8,43</b>   | <b>16,99</b>  |
| AALF024273 | 39S ribosomal protein L34                                                   | 5,89  | 4,22          | <b>16,02</b>  |
| AALF007525 | LITAF domain-containing protein                                             | 1,21  | 4,42          | <b>15,98</b>  |
| AALF027170 | Unspecified product                                                         | -1,58 | 1,25          | <b>15,88</b>  |
| AALF017272 | 60S ribosome subunit biogenesis protein NIP7 homolog                        | 3,1   | 1,65          | <b>15,14</b>  |
| AALF026705 | Putative mitochondrial import inner membrane translocase subunit tim8       | 3,79  | <b>7,09</b>   | <b>14,53</b>  |
| AALF008938 | Putative vesicle coat complex copi zeta subunit                             | 3,62  | <b>9,19</b>   | <b>14,5</b>   |
| AALF003871 | Pyrroline-5-carboxylate reductase                                           | 1,59  | 4,59          | <b>14,48</b>  |
| AALF019391 | Unspecified product                                                         | 2,09  | 7,57          | <b>14,47</b>  |
| AALF001937 | Unspecified product                                                         | -1,14 | -1,04         | <b>14,4</b>   |
| AALF028288 | Unspecified product                                                         | -1,03 | 4,61          | <b>13,69</b>  |
| AALF015083 | Unspecified product                                                         | 1,67  | 2,97          | <b>13,55</b>  |
| AALF009537 | Unspecified product                                                         | 4,04  | 5,38          | <b>13,51</b>  |
| AALF005816 | ER membrane protein complex subunit 4                                       | 2,63  | <b>6,19</b>   | <b>13,48</b>  |
| AALF020200 | Mitochondrial ornithine transporter                                         | 1     | 4,54          | <b>12,63</b>  |
| AALF017894 | Pyrroline-5-carboxylate reductase                                           | 2,14  | 4,63          | <b>12,61</b>  |
| AALF018519 | Nudix hydrolase domain-containing protein                                   | 3,38  | 6,5           | <b>12,58</b>  |
| AALF027267 | 39S ribosomal protein L22                                                   | 3,8   | 5,8           | <b>12,35</b>  |
| AALF014826 | Unspecified product                                                         | 1,94  | 4,75          | <b>12,18</b>  |
| AALF001439 | F-box domain-containing protein                                             | 1,17  | 2,07          | <b>12,08</b>  |
| AALF016188 | Eukaryotic translation initiation factor                                    | 1,15  | 3,63          | <b>12,08</b>  |

|            |                                                                |       |              |               |
|------------|----------------------------------------------------------------|-------|--------------|---------------|
| AALF002862 | 39S mitochondrial ribosomal protein L28                        | 1,95  | 3,86         | <b>11,74</b>  |
| AALF020008 | Putative growth hormone-induced protein                        | -1,02 | <b>5,97</b>  | <b>11,55</b>  |
| AALF019423 | Signal peptidase complex catalytic subunit SEC11               | 1,83  | <b>9,96</b>  | <b>11,53</b>  |
| AALF001336 | Putative selenoprotein g                                       | 1,76  | <b>7,66</b>  | <b>11,45</b>  |
| AALF017936 | Unspecified product                                            | 1,01  | 2,76         | <b>11,22</b>  |
| AALF016828 | Unspecified product                                            | 1,91  | 4,99         | <b>10,96</b>  |
| AALF022971 | RING-CH-type domain-containing protein                         | -1,12 | 3,28         | <b>10,7</b>   |
| AALF023408 | Unspecified product                                            | 1,85  | 1,78         | <b>10,51</b>  |
| AALF001047 | Unspecified product                                            | 6,11  | 7,79         | <b>10,24</b>  |
| AALF000279 | PHB domain-containing protein                                  | -1,28 | 4,25         | <b>10,23</b>  |
| AALF020872 | Putative secreted protein                                      | 3,11  | 1,81         | <b>10,22</b>  |
| AALF015963 | Unspecified product                                            | 2,45  | 3,88         | <b>10,13</b>  |
| AALF003447 | Unspecified product                                            | 2,49  | 4,23         | <b>10,13</b>  |
| AALF002436 | DUF155 domain-containing protein                               | 1,63  | 2,98         | <b>10,01</b>  |
| AALF015692 | Unspecified product                                            | -1,76 | -3,97        | <b>-10,02</b> |
| AALF008397 | ANK_REP_REGION domain-containing protein                       | -2,3  | -2,38        | <b>-10,1</b>  |
| AALF028546 | GH16 domain-containing protein                                 | 1,22  | -5,77        | <b>-10,16</b> |
| AALF017425 | VWFC domain-containing protein                                 | -1,73 | -3,33        | <b>-10,56</b> |
| AALF013861 | Unspecified product                                            | -2,16 | -4,53        | <b>-10,75</b> |
| AALF006764 | Reverse transcriptase domain-containing protein                | -2,19 | -3,66        | <b>-11,09</b> |
| AALF016175 | Matrix metalloproteinase                                       | -1,12 | -4,22        | <b>-11,11</b> |
| AALF008809 | Nidogen                                                        | -1,14 | -3,6         | <b>-11,13</b> |
| AALF022970 | Unspecified product                                            | -1,43 | -1,99        | <b>-11,22</b> |
| AALF002486 | Reverse transcriptase Ty1/copia-type domain-containing protein | -2,33 | -1,96        | <b>-11,23</b> |
| AALF025212 | Transferrin                                                    | -1,06 | -2,2         | <b>-11,31</b> |
| AALF023670 | Unspecified product                                            | 1,12  | -2,12        | <b>-11,41</b> |
| AALF021839 | Sodium/solute symporter                                        | -1,11 | -2,13        | <b>-11,49</b> |
| AALF025224 | Integrase catalytic domain-containing protein                  | 1,37  | -1,81        | <b>-11,5</b>  |
| AALF023157 | Tyrosinase_Cu-bd domain-containing protein                     | -1,33 | -3,25        | <b>-11,57</b> |
| AALF003039 | Prophenoloxidase                                               | -1,24 | -3,68        | <b>-11,71</b> |
| AALF000130 | dNK domain-containing protein                                  | 1,31  | -3,9         | <b>-12,04</b> |
| AALF011858 | Vitellogenin domain-containing protein                         | -2,73 | -2,63        | <b>-12,19</b> |
| AALF017340 | RGS domain-containing protein                                  | -1,61 | -2,27        | <b>-12,81</b> |
| AALF008038 | Y-box binding protein                                          | -2,35 | -2,77        | <b>-12,98</b> |
| AALF005743 | Reverse transcriptase Ty1/copia-type domain-containing protein | -1,17 | -5,88        | <b>-13,17</b> |
| AALF021923 | Gamma-glutamyl hydrolase                                       | -1,04 | <b>-6,21</b> | <b>-13,49</b> |
| AALF008037 | Unspecified product                                            | -1,8  | -4,48        | <b>-13,61</b> |
| AALF018011 | Unspecified product                                            | -1,33 | -2,11        | <b>-13,68</b> |
| AALF007570 | Clip-Domain Serine Protease family B                           | -1,02 | -5,2         | <b>-13,82</b> |
| AALF004790 | Unspecified product                                            | -1,45 | -3,6         | <b>-13,94</b> |
| AALF012770 | Aldehyde oxidase                                               | -1,31 | -1,99        | <b>-14,1</b>  |

|            |                                                                   |       |       |                   |
|------------|-------------------------------------------------------------------|-------|-------|-------------------|
| AALF005637 | Belongs to the short-chain dehydrogenases/reductases (SDR) family | 2,41  | -1,64 | <b>-14,23</b>     |
| AALF019880 | Dihydropyrimidine dehydrogenase [NADP(+)]                         | -1,58 | -1,48 | <b>-14,35</b>     |
| AALF011617 | Unspecified product                                               | -1,15 | -3,14 | <b>-14,54</b>     |
| AALF023601 | Peroxidasin                                                       | -2,29 | -4,08 | <b>-14,55</b>     |
| AALF013089 | tRNA_NucTransf2 domain-containing protein                         | -1,07 | -2,31 | <b>-15,4</b>      |
| AALF013129 | Trehalose-6-phosphate synthase                                    | -2    | -1,97 | <b>-15,42</b>     |
| AALF001667 | Unspecified product                                               | -1,31 | -3,25 | <b>-15,86</b>     |
| AALF006674 | Integrase catalytic domain-containing protein                     | -1,27 | -2,25 | <b>-15,87</b>     |
| AALF013610 | Dihydropyrimidine dehydrogenase [NADP(+)]                         | -1,94 | -1,75 | <b>-16,22</b>     |
| AALF008099 | Endothelin-converting enzyme                                      | -1,48 | -2,33 | <b>-16,37</b>     |
| AALF006673 | Retrotrans_gag domain-containing protein                          | -1,72 | -1,77 | <b>-16,56</b>     |
| AALF016666 | FHA domain-containing protein                                     | -1,46 | -3,44 | <b>-16,9</b>      |
| AALF004114 | No-mechanoreceptor potential a                                    | -1,23 | -4,37 | <b>-17,22</b>     |
| AALF024124 | Cytochrome P450                                                   | -1,1  | -2,2  | <b>-17,94</b>     |
| AALF011816 | Integrase catalytic domain-containing protein                     | 1,13  | -1,55 | <b>-18,07</b>     |
| AALF007569 | Peptidase S1 domain-containing protein                            | 1,53  | -3,46 | <b>-19,17</b>     |
| AALF016566 | Unspecified product                                               | -2,79 | -3,48 | <b>-19,75</b>     |
| AALF000129 | Reverse transcriptase domain-containing protein                   | -1,05 | -2,82 | <b>-21,58</b>     |
| AALF019918 | Unspecified product                                               | -1,5  | -3,47 | <b>-22,73</b>     |
| AALF016286 | B box-type domain-containing protein                              | -1,35 | -4,14 | <b>-23,66</b>     |
| AALF014933 | Prophenoloxidase                                                  | -1,12 | -3,69 | <b>-29,38</b>     |
| AALF004309 | Putative sodium/potassium-transporting atpase subunit beta-2      | -1,05 | -3,4  | <b>-31,2</b>      |
| AALF006581 | CHK domain-containing protein                                     | 1,13  | -2,76 | <b>-32,13</b>     |
| AALF012955 | Serine protease                                                   | 1,34  | -5,56 | <b>-38,1</b>      |
| AALF022750 | Unspecified product                                               | -4,33 | -9,64 | <b>-47,74</b>     |
| AALF020600 | RT_RNaseH domain-containing protein                               | -2,19 | -2,62 | <b>-70,65</b>     |
| AALF007138 | Histone H2A                                                       | 1,56  | 1,65  | <b>-85,16</b>     |
| AALF003951 | Reverse transcriptase Ty1/copia-type domain-containing protein    | -1,13 | -2,67 | <b>-104,44</b>    |
| AALF010649 | Histone H2A                                                       | 4,09  | 1,37  | <b>-122,87</b>    |
| AALF010137 | Histone H2B                                                       | 2,31  | -2,24 | <b>-149,04</b>    |
| AALF014537 | Histone H2B                                                       | 1,14  | -2,71 | <b>-223,22</b>    |
| AALF024096 | Unspecified product                                               | -1,28 | -3,16 | <b>-342,06</b>    |
| AALF010648 | Histone H2B                                                       | 1,41  | -2,11 | <b>-344,4</b>     |
| AALF028233 | Unspecified product                                               | -4,19 | 2,06  | <b>-988301,15</b> |
