# Supplementary material for: Transcriptome Analysis of an Aedes albopictus Cell Line Single- and Dual-Infected with Lammi Virus and WNV
Source: MDPI journal article supplement (doi:10.3390/ijms23020875), 2022-01-14
Supplement: s1 [file s1]

**Supplementary Table S3.** List of *Ae. albopictus* differentially expressed transcripts (>10 fold change) post dual-infection. Fold change is shown post WNV challenge. Bold numbers have p-adjust value  $\leq 0.01$

| Transcript ID | Gene description                     | Fold change<br>24 hpi with<br>WNV | Fold change<br>48 hpi with<br>WNV |
|---------------|--------------------------------------|-----------------------------------|-----------------------------------|
| AALF021807    | C-Type Lysozyme (Lys-E)              | <b>433,67</b>                     | 5,25                              |
| AALF003252    | Unspecified product                  | <b>141,8</b>                      | 6,88                              |
| AALF016234    | C-Type Lectin                        | <b>82,76</b>                      | <b>22,12</b>                      |
| AALF010414    | Beta-hexosaminidase b                | <b>73,13</b>                      | 1,29                              |
| AALF013298    | Unspecified product                  | <b>69,07</b>                      | <b>23,19</b>                      |
| AALF022426    | Unspecified product                  | <b>58,18</b>                      | 1,24                              |
| AALF009966    | Unspecified product                  | <b>57,49</b>                      | 3,8                               |
| AALF003774    | Fibrinogen and fibronectin           | <b>52,19</b>                      | <b>9,14</b>                       |
| AALF019859    | Clip-Domain Serine Protease family B | <b>49,47</b>                      | <b>7,65</b>                       |
| AALF008821    | Defensin anti-microbial peptide      | <b>45,81</b>                      | <b>16,18</b>                      |
| AALF008776    | Aromatic amino acid decarboxylase    | <b>44,81</b>                      | 2,13                              |
| AALF022425    | Unspecified product                  | <b>30,37</b>                      | 3,47                              |
| AALF009414    | Putative secreted protein            | <b>27,46</b>                      | 4,81                              |
| AALF026731    | Unspecified product                  | <b>22,2</b>                       | <b>12,95</b>                      |
| AALF001194    | Unspecified product                  | <b>21,11</b>                      | -1,02                             |
| AALF008229    | Unspecified product                  | <b>19,8</b>                       | 1,13                              |
| AALF001093    | Calreticulin                         | <b>18,74</b>                      | 1,48                              |
| AALF007742    | Unspecified product                  | <b>18,38</b>                      | -4,01                             |
| AALF020341    | Unspecified product                  | <b>18,34</b>                      | -1,1                              |
| AALF023135    | Unspecified product                  | <b>18,05</b>                      | -1,29                             |
| AALF016505    | Leucine-rich immune protein          | <b>16,82</b>                      | -1,43                             |
| AALF025212    | Transferrin                          | <b>15,93</b>                      | -1,08                             |
| AALF020197    | Clip-Domain Serine Protease family B | <b>15,24</b>                      | <b>-6,49</b>                      |
| AALF020799    | Peptidoglycan Recognition Protein    | <b>14,47</b>                      | <b>8,03</b>                       |
| AALF000812    | Unspecified product                  | <b>14,35</b>                      | -2,81                             |
| AALF001195    | Unspecified product                  | <b>12,67</b>                      | 1,22                              |
| AALF007525    | Unspecified product                  | <b>12,61</b>                      | <b>23,73</b>                      |
| AALF008452    | Unspecified product                  | <b>12,06</b>                      | 1,2                               |
| AALF015567    | Cystathionine beta-synthase          | <b>11,47</b>                      | 2,07                              |
| AALF014689    | Fibrinogen and fibronectin           | <b>10,7</b>                       | -2,12                             |
| AALF002418    | Imaginal disc growth factor          | <b>10,43</b>                      | 3,14                              |
| AALF023540    | Unspecified product                  | <b>10,41</b>                      | 1                                 |
| AALF023089    | Serine--pyruvate aminotransferase    | <b>10,31</b>                      | 2,58                              |
| AALF001232    | Pyruvate carboxylase                 | <b>10,23</b>                      | -1,45                             |
| AALF016365    | Munc13-4                             | <b>10,03</b>                      | <b>6,05</b>                       |
| AALF011706    | Unspecified product                  | <b>-10,79</b>                     | <b>-26,44</b>                     |
| AALF008709    | Mfs transporter                      | <b>-10,8</b>                      | <b>-7,4</b>                       |
| AALF028505    | Unspecified product                  | <b>-13,72</b>                     | <b>-65,33</b>                     |
| AALF020168    | Unspecified product                  | <b>-13,93</b>                     | <b>-22,6</b>                      |

|            |                                      |            |         |
|------------|--------------------------------------|------------|---------|
| AALF025541 | Unspecified product                  | -15,32     | -7,35   |
| AALF008099 | Endothelin-converting enzyme         | -15,39     | -66,8   |
| AALF000742 | Unspecified product                  | -15,81     | -54,52  |
| AALF010788 | Unspecified product                  | -16,19     | -3,04   |
| AALF008879 | Type IV inositol 5-phosphatase       | -16,65     | -60,51  |
| AALF016756 | Sugar transporter                    | -16,65     | -3,67   |
| AALF005838 | Unspecified product                  | -19,31     | -3,52   |
| AALF022022 | cdkl1/4                              | -23,59     | -3,78   |
| AALF004114 | No-mechanoreceptor potential a       | -24,69     | -45,32  |
| AALF011390 | Putative ecdysone-induced protein    | -26,61     | -21,06  |
| AALF020798 | Unspecified product                  | -29,45     | -10,58  |
| AALF000142 | Unspecified product                  | -31,21     | -9,07   |
| AALF009909 | Unspecified product                  | -32,33     | -140,61 |
| AALF001259 | Unspecified product                  | -36,13     | -36,84  |
| AALF014478 | Heat shock protein HSP70             | -37,21     | -2,23   |
| AALF012770 | Aldehyde oxidase                     | -37,85     | -39,12  |
| AALF001105 | Unspecified product                  | -40,91     | -26,97  |
| AALF002857 | Unspecified product                  | -42,81     | -133,32 |
| AALF002636 | Unspecified product                  | -43,27     | -11,27  |
| AALF014479 | Unspecified product                  | -45,78     | -4,49   |
| AALF025810 | Unspecified product                  | -51,86     | -28,39  |
| AALF013937 | Serine protease                      | -52,04     | -60,31  |
| AALF014375 | Unspecified product                  | -57,5      | -72,13  |
| AALF014481 | Unspecified product                  | -61,13     | -4,53   |
| AALF027745 | Microtubule-associated protein       | -61,99     | -12,41  |
| AALF009202 | C-Type Lectin (CTL)                  | -65,3      | -13,8   |
| AALF013936 | Unspecified product                  | -78,5      | -156,98 |
| AALF006472 | Unspecified product                  | -86,08     | -193,34 |
| AALF018782 | Unspecified product                  | -140,73    | -7,07   |
| AALF015015 | Unspecified product                  | -230,79    | -2,78   |
| AALF015014 | Clip-Domain Serine Protease family D | -245,49    | -75,47  |
| AALF016295 | Unspecified product                  | -249,88    | -269,15 |
| AALF014395 | Unspecified product                  | -605,75    | -300,78 |
| AALF028496 | Unspecified product                  | -78146,04  | -2,52   |
| AALF005731 | Zinc finger protein                  | -108806,97 | -3,06   |
| AALF010569 | Unspecified product                  | 55,04      | 6440,46 |
| AALF001962 | Unspecified product                  | -11,56     | 609,49  |
| AALF013640 | Unspecified product                  | 2,62       | 174,41  |
| AALF018203 | Mitogen-activated protein kinase     | 1,67       | 146,9   |
| AALF004571 | Unspecified product                  | 9,85       | 122,64  |
| AALF013285 | Unspecified product                  | -1,1       | 106,95  |
| AALF019759 | Unspecified product                  | 1,81       | 88,79   |
| AALF003990 | Mannosyltransferase                  | 7,13       | 88,65   |

|            |                                                                       |       |       |
|------------|-----------------------------------------------------------------------|-------|-------|
| AALF003128 | 4-nitrophenylphosphatase                                              | 7,55  | 66,68 |
| AALF003110 | Unspecified product                                                   | 2,94  | 57,86 |
| AALF005738 | Unspecified product                                                   | 3,28  | 52,57 |
| AALF013715 | Unspecified product                                                   | 5,78  | 44,94 |
| AALF025486 | Unspecified product                                                   | 4,16  | 44,72 |
| AALF011149 | Unspecified product                                                   | 1,37  | 44,14 |
| AALF011886 | Mitogen-activated protein kinase                                      | 3,5   | 43,42 |
| AALF010775 | Unspecified product                                                   | 42,41 | 43,12 |
| AALF011414 | Unspecified product                                                   | 2,71  | 40,53 |
| AALF020693 | Unspecified product                                                   | -2,54 | 40,21 |
| AALF022006 | Unspecified product                                                   | 14,55 | 39,8  |
| AALF003569 | Unspecified product                                                   | 9,47  | 39,52 |
| AALF002752 | Unspecified product                                                   | 3,56  | 37,95 |
| AALF001937 | Unspecified product                                                   | 4,45  | 37,7  |
| AALF021815 | Sulfhydryl oxidase                                                    | 1,83  | 33,37 |
| AALF027170 | Unspecified product                                                   | -1,18 | 32,06 |
| AALF026344 | Unspecified product                                                   | 2,55  | 31,71 |
| AALF021835 | BiP/GRP78                                                             | 8,37  | 31,7  |
| AALF027168 | Pcdc2/rp-8                                                            | 6,72  | 29,28 |
| AALF005588 | L-lactate dehydrogenase                                               | 8,1   | 28,92 |
| AALF026694 | GrpE protein homolog                                                  | 4,77  | 28,84 |
| AALF023086 | Sil1                                                                  | 1,5   | 28,59 |
| AALF012753 | Unspecified product                                                   | 12,07 | 28,33 |
| AALF024273 | 39S ribosomal protein L34                                             | 2,68  | 26,79 |
| AALF019596 | Unspecified product                                                   | 2,78  | 26,78 |
| AALF007470 | Unspecified product                                                   | 1,58  | 25,27 |
| AALF003871 | Unspecified product                                                   | 2,78  | 24,79 |
| AALF005644 | Protein KRTCAP2 homolog                                               | -1,05 | 23,85 |
| AALF017272 | 60S ribosome subunit biogenesis protein NIP7 homolog                  | 2,63  | 23,72 |
| AALF028423 | Poly [ADP-ribose] polymerase                                          | 1,11  | 23,69 |
| AALF019485 | Unspecified product                                                   | 3,6   | 23,68 |
| AALF007387 | Unspecified product                                                   | 3,27  | 23,54 |
| AALF003976 | Unspecified product                                                   | 10,42 | 23,4  |
| AALF014826 | Unspecified product                                                   | 1,78  | 22,82 |
| AALF006960 | Derlin                                                                | 2,33  | 21,84 |
| AALF014725 | Unspecified product                                                   | 5,5   | 21,4  |
| AALF008938 | Putative vesicle coat complex copI zeta subunit                       | 2,98  | 21,29 |
| AALF006247 | Putative microsomal signal peptidase 25 kDa subunit                   | 8,72  | 20,65 |
| AALF003192 | Signal peptidase complex subunit 3                                    | 6,58  | 20,26 |
| AALF019423 | Signal peptidase complex catalytic subunit SEC11                      | 5,27  | 19,83 |
| AALF026705 | Putative mitochondrial import inner membrane translocase subunit tim8 | 1,19  | 19,77 |
| AALF005816 | ER membrane protein complex subunit 4                                 | 3,83  | 18,61 |

|            |                                                                        |       |       |
|------------|------------------------------------------------------------------------|-------|-------|
| AALF018519 | Unspecified product                                                    | 2,37  | 18,5  |
| AALF017894 | Pyrroline-5-carboxylate reductase                                      | 1,73  | 18,46 |
| AALF010277 | L-lactate dehydrogenase                                                | 4,25  | 18,42 |
| AALF017936 | Unspecified product                                                    | 1,21  | 18,35 |
| AALF027267 | 39S ribosomal protein L22                                              | 2,55  | 18,28 |
| AALF019139 | Hect E3 ubiquitin ligase                                               | 1,24  | 17,75 |
| AALF021211 | Unspecified product                                                    | 4,56  | 16,31 |
| AALF018192 | Kinase                                                                 | 3,69  | 16,17 |
| AALF006811 | Metaxin                                                                | 6,87  | 16,14 |
| AALF023408 | Unspecified product                                                    | 2,68  | 16,02 |
| AALF013670 | Unspecified product                                                    | 6,32  | 15,93 |
| AALF017066 | Unspecified product                                                    | 1,6   | 15,88 |
| AALF002862 | 39S mitochondrial ribosomal protein L28                                | 3,2   | 15,52 |
| AALF028288 | Unspecified product                                                    | 1,57  | 15,45 |
| AALF016188 | Eukaryotic translation initiation factor                               | 5,44  | 15,34 |
| AALF012726 | Unspecified product                                                    | 2,67  | 14,99 |
| AALF015083 | Unspecified product                                                    | 2,3   | 14,81 |
| AALF023527 | Unspecified product                                                    | 1,63  | 14,76 |
| AALF025878 | Unspecified product                                                    | 2,99  | 14,65 |
| AALF002306 | Unspecified product                                                    | 5,12  | 14,64 |
| AALF002436 | Unspecified product                                                    | 1,83  | 14,64 |
| AALF016399 | Unspecified product                                                    | 3,82  | 14,59 |
| AALF015963 | Unspecified product                                                    | -1,04 | 14,48 |
| AALF017030 | Unspecified product                                                    | 3,04  | 14,3  |
| AALF010131 | Unspecified product                                                    | 4,79  | 14,26 |
| AALF017935 | Stearoyl-coa desaturase                                                | -1,07 | 14    |
| AALF024308 | Unspecified product                                                    | 2,94  | 13,99 |
| AALF007472 | Unspecified product                                                    | 1,48  | 13,9  |
| AALF003428 | Unspecified product                                                    | 10,77 | 13,85 |
| AALF027123 | Long-chain-fatty-acid coa ligase                                       | 3,29  | 13,77 |
| AALF001336 | Putative selenoprotein g                                               | 3,02  | 13,71 |
| AALF023156 | tRNA (adenine(58)-N(1))-methyltransferase catalytic subunit<br>TRMT61A | 2,66  | 13,46 |
| AALF002987 | Unspecified product                                                    | 1,52  | 13,31 |
| AALF008836 | Unspecified product                                                    | 1,58  | 13,26 |
| AALF017325 | Unspecified product                                                    | 1,27  | 13,12 |
| AALF020872 | Putative secreted protein                                              | 2,34  | 13,05 |
| AALF021933 | Unspecified product                                                    | 1,31  | 13,04 |
| AALF010887 | Unspecified product                                                    | -1,08 | 13,02 |
| AALF008678 | Choline-phosphate cytidylyltransferase a, b                            | 9,83  | 12,99 |
| AALF011939 | Endoplasmin                                                            | 5,12  | 12,98 |
| AALF021504 | Unspecified product                                                    | 2,43  | 12,79 |
| AALF015904 | Unspecified product                                                    | 3,51  | 12,77 |

|            |                                                                       |       |        |
|------------|-----------------------------------------------------------------------|-------|--------|
| AALF026342 | Unspecified product                                                   | 3,08  | 12,76  |
| AALF001505 | Cell adhesion molecule                                                | 1,27  | 12,75  |
| AALF006812 | Short-chain dehydrogenase                                             | 2,02  | 12,34  |
| AALF010373 | Phosphoglycerate mutase                                               | 1,36  | 12,34  |
| AALF008913 | Unspecified product                                                   | 2,7   | 12,15  |
| AALF006680 | Unspecified product                                                   | 2,47  | 12,03  |
| AALF020200 | Mitochondrial ornithine transporter                                   | 3,24  | 12,01  |
| AALF009639 | Unspecified product                                                   | 6,06  | 11,84  |
| AALF012016 | DnaJ homolog subfamily B member 11 precursor                          | 2,05  | 11,77  |
| AALF020282 | Unspecified product                                                   | 3,15  | 11,72  |
| AALF002846 | Putative cpj005033 nucleolar protein nhp2                             | 4,43  | 11,71  |
| AALF001439 | Unspecified product                                                   | 1,36  | 11,71  |
| AALF000613 | Unspecified product                                                   | 2,5   | 11,65  |
| AALF014036 | Unspecified product                                                   | 2,26  | 11,57  |
| AALF016160 | Activating signal cointegrator 1 complex subunit 3, helc1             | 1,84  | 11,46  |
| AALF013787 | Unspecified product                                                   | -1,07 | 11,36  |
| AALF016639 | Unspecified product                                                   | -1,09 | 11,23  |
| AALF026969 | Unspecified product                                                   | 2,22  | 11,07  |
| AALF002466 | Protein disulfide-isomerase A6 precursor                              | 5,2   | 11,04  |
| AALF003447 | Unspecified product                                                   | 1,96  | 10,92  |
| AALF013154 | Unspecified product                                                   | 4,78  | 10,9   |
| AALF019760 | Unspecified product                                                   | 7,48  | 10,43  |
| AALF020008 | Putative growth hormone-induced protein                               | 6,29  | 10,4   |
| AALF019136 | Unspecified product                                                   | -1,68 | 10,28  |
| AALF001501 | Phosphoglucomutase                                                    | 2,24  | 10,27  |
| AALF022744 | Mitochondria associated granulocyte macrophage csf signaling molecule | 1,04  | 10,21  |
| AALF014037 | Cle7                                                                  | 2,48  | 10,05  |
| AALF009537 | Unspecified product                                                   | -1,03 | 10     |
| AALF003854 | Repressor of RNA polymerase III transcription MAF1                    | -1,16 | -10,05 |
| AALF023601 | Peroxidasin                                                           | 4,7   | -10,12 |
| AALF013429 | Unspecified product                                                   | -6,17 | -10,13 |
| AALF006047 | Unspecified product                                                   | -3,13 | -10,17 |
| AALF026258 | DNA helicase                                                          | -2,55 | -10,19 |
| AALF023157 | Unspecified product                                                   | -1,32 | -10,47 |
| AALF003039 | Prophenoloxidase                                                      | -1,52 | -10,48 |
| AALF015542 | Unspecified product                                                   | 2,05  | -10,57 |
| AALF008037 | Unspecified product                                                   | 1,07  | -10,65 |
| AALF016899 | Unspecified product                                                   | -1,67 | -10,7  |
| AALF023425 | Unspecified product                                                   | -2,87 | -10,73 |
| AALF011299 | Gamma glutamyl transpeptidases                                        | -6,92 | -10,92 |
| AALF017425 | Unspecified product                                                   | 4,66  | -10,93 |
| AALF021839 | Sodium/solute symporter                                               | -3,69 | -11,1  |

|            |                                                          |        |        |
|------------|----------------------------------------------------------|--------|--------|
| AALF027385 | Adenylate cyclase                                        | -2,16  | -11,11 |
| AALF005533 | Unspecified product                                      | -3,84  | -11,48 |
| AALF011858 | Unspecified product                                      | -8,58  | -11,66 |
| AALF008809 | Nidogen                                                  | 2,1    | -11,94 |
| AALF024686 | Unspecified product                                      | -3,35  | -11,99 |
| AALF015269 | Unspecified product                                      | -3,8   | -12,26 |
| AALF020706 | Bifunctional purine biosynthesis protein                 | -1,77  | -12,54 |
| AALF019525 | Unspecified product                                      | -8,92  | -12,58 |
| AALF000395 | Unspecified product                                      | 1,42   | -13,67 |
| AALF018338 | F-spondin                                                | 1,41   | -13,93 |
| AALF003944 | Unspecified product                                      | -6,28  | -14,29 |
| AALF025462 | Unspecified product                                      | -15,65 | -14,74 |
| AALF000129 | Unspecified product                                      | 4,62   | -15,36 |
| AALF008893 | Unspecified product                                      | -2,66  | -15,6  |
| AALF024829 | Brain chitinase and chia                                 | -2,11  | -15,73 |
| AALF011491 | Unspecified product                                      | 1,83   | -15,84 |
| AALF015943 | Methylenetetrahydrofolate dehydrogenase                  | 2,08   | -15,87 |
| AALF008765 | Glutamate synthase                                       | -1,18  | -16,02 |
| AALF000130 | Unspecified product                                      | 3,55   | -16,06 |
| AALF022389 | Unspecified product                                      | -1,36  | -16,26 |
| AALF007615 | Unspecified product                                      | -9,62  | -16,35 |
| AALF005637 | Unspecified product                                      | -2,92  | -16,39 |
| AALF007101 | Unspecified product                                      | -1,95  | -16,99 |
| AALF019868 | F-spondin                                                | 2,69   | -17,25 |
| AALF007246 | Unspecified product                                      | -1,25  | -17,35 |
| AALF009035 | Cyclin a                                                 | -4,45  | -17,38 |
| AALF007570 | Clip-Domain Serine Protease family B. Protease homologue | 1,65   | -17,51 |
| AALF009765 | Glutamate synthase                                       | -1,77  | -17,84 |
| AALF027905 | Prophenoloxidase                                         | 1,78   | -18,05 |
| AALF023670 | Unspecified product                                      | -2,97  | -18,05 |
| AALF005743 | Unspecified product                                      | -4,54  | -18,17 |
| AALF012739 | Alpha-mannosidase                                        | -2,52  | -18,34 |
| AALF027708 | Unspecified product                                      | -2,68  | -18,36 |
| AALF013089 | Unspecified product                                      | -2,8   | -18,83 |
| AALF021923 | Gamma-glutamyl hydrolase                                 | 1,27   | -18,85 |
| AALF012022 | Sodium-dependent phosphate transporter                   | -1,57  | -19,08 |
| AALF016175 | Matrix metalloproteinase                                 | -2,76  | -19,59 |
| AALF014285 | Unspecified product                                      | -8,93  | -19,82 |
| AALF002486 | Unspecified product                                      | -14,81 | -20,11 |
| AALF006132 | Unspecified product                                      | -7,01  | -20,49 |
| AALF025231 | Unspecified product                                      | -9,13  | -20,68 |
| AALF017372 | Translin associated factor x                             | -7,52  | -20,69 |
| AALF016456 | Unspecified product                                      | -12,44 | -21,08 |

|            |                                                              |        |        |
|------------|--------------------------------------------------------------|--------|--------|
| AALF003366 | Unspecified product                                          | -13,7  | -21,34 |
| AALF027074 | Unspecified product                                          | -7,49  | -21,61 |
| AALF028546 | Unspecified product                                          | -6,17  | -21,84 |
| AALF016286 | Unspecified product                                          | -2,81  | -21,87 |
| AALF012694 | Putative apolipoprotein d/lipocalin                          | -3,92  | -22,44 |
| AALF022970 | Unspecified product                                          | -2     | -22,52 |
| AALF024663 | GPCR Octopamine/Tyramine Family                              | -21,55 | -22,72 |
| AALF002599 | Unspecified product                                          | -2,44  | -22,85 |
| AALF011816 | Unspecified product                                          | -2     | -23,22 |
| AALF018011 | Unspecified product                                          | -1,62  | -23,59 |
| AALF013129 | Trehalose-6-phosphate synthase                               | -1,93  | -23,66 |
| AALF003849 | Unspecified product                                          | -6,36  | -24,34 |
| AALF016501 | Unspecified product                                          | -7,73  | -24,6  |
| AALF016566 | Unspecified product                                          | -2,33  | -25,09 |
| AALF026911 | GPCR Orphan/Putative Class B Family                          | -7,02  | -25,17 |
| AALF020305 | Carboxylic ester hydrolase                                   | -5,35  | -25,29 |
| AALF027964 | Unspecified product                                          | -11,8  | -25,36 |
| AALF023403 | Unspecified product                                          | -7,12  | -25,75 |
| AALF028503 | Defense repressor                                            | -5,65  | -26,16 |
| AALF012970 | Unspecified product                                          | 1,93   | -26,36 |
| AALF021548 | GPCRG astrin/Bombesin Family                                 | -13,46 | -26,74 |
| AALF021556 | Unspecified product                                          | -26,66 | -28,34 |
| AALF025810 | Unspecified product                                          | -51,86 | -28,39 |
| AALF010876 | Unspecified product                                          | -5,21  | -28,97 |
| AALF008397 | Unspecified product                                          | -8,95  | -29,55 |
| AALF006674 | Unspecified product                                          | -11,91 | -29,68 |
| AALF006581 | Unspecified product                                          | 1,36   | -29,76 |
| AALF006673 | Unspecified product                                          | -6,18  | -31,67 |
| AALF010019 | Brain chitinase and chia                                     | -3,66  | -33,56 |
| AALF004309 | Putative sodium/potassium-transporting atpase subunit beta-2 | 4,1    | -34,15 |
| AALF019880 | Dihydropyrimidine dehydrogenase [NADP(+)]                    | 1,25   | -35,91 |
| AALF010137 | Histone H2B                                                  | 1,34   | -38,11 |
| AALF014933 | Prophenoloxidase                                             | 3,43   | -38,44 |
| AALF020399 | Unspecified product                                          | -38,38 | -39,25 |
| AALF013610 | Dihydropyrimidine dehydrogenase [NADP(+)]                    | 1,27   | -42,04 |
| AALF022513 | Unspecified product                                          | -2,36  | -44,29 |
| AALF016111 | Unspecified product                                          | -9,53  | -44,64 |
| AALF012955 | Serine protease                                              | -3,92  | -45,02 |
| AALF014537 | Histone H2B                                                  | 2,06   | -50,14 |
| AALF003951 | Unspecified product                                          | -7,78  | -53,28 |
| AALF010648 | Histone H2B                                                  | 1,91   | -54,45 |
| AALF005415 | Unspecified product                                          | -27,49 | -57,41 |
| AALF020202 | Unspecified product                                          | -9,21  | -58,36 |

|            |                            |         |                 |
|------------|----------------------------|---------|-----------------|
| AALF024124 | Cytochrome P450            | 3,79    | <b>-62,99</b>   |
| AALF004118 | Unspecified product        | -8,76   | <b>-65,39</b>   |
| AALF010649 | Histone H2A                | -1,26   | <b>-86,69</b>   |
| AALF011637 | Unspecified product        | -5,25   | <b>-96,12</b>   |
| AALF012023 | Unspecified product        | -8,18   | <b>-101,26</b>  |
| AALF016470 | Carboxylic ester hydrolase | -1,19   | <b>-126,43</b>  |
| AALF019822 | Unspecified product        | -80,8   | <b>-152,61</b>  |
| AALF010790 | Unspecified product        | -2,76   | <b>-168,37</b>  |
| AALF022750 | Unspecified product        | -10,19  | <b>-209,59</b>  |
| AALF019479 | Unspecified product        | -39,56  | <b>-321,03</b>  |
| AALF013172 | Alpha-amylase              | -4,84   | <b>-370,93</b>  |
| AALF012014 | Unspecified product        | -19,42  | <b>-566,3</b>   |
| AALF023401 | Unspecified product        | -130,49 | <b>-645,54</b>  |
| AALF018987 | Unspecified product        | -1,11   | <b>-2938,92</b> |
